# Supplementary material for: Community-based Inquiry Improves Critical Thinking in General Education Biology
Source: Atypon-hosted journal article supplement (doi:10.1187/cbe.07-11-0097), 2008-09-01
Supplement: suppb.pdf [file suppb.pdf]

### **Biology 101 Poster Evaluation Rubric**

| <b>Element</b>                          | <b>Weight</b> | <b>Excellent (9-10 pts)</b>                                                                                                                                                                                                                                                           | <b>Good (7-8 pts)</b>                                                                                                                                                                                                                                                                                  | <b>Proficient (5-6 pts)</b>                                                                                                                                                                                                                                                                                          | <b>Partially Proficient (3-4 pt)</b>                                                                                                                                                                                                                                                                     |
|-----------------------------------------|---------------|---------------------------------------------------------------------------------------------------------------------------------------------------------------------------------------------------------------------------------------------------------------------------------------|--------------------------------------------------------------------------------------------------------------------------------------------------------------------------------------------------------------------------------------------------------------------------------------------------------|----------------------------------------------------------------------------------------------------------------------------------------------------------------------------------------------------------------------------------------------------------------------------------------------------------------------|----------------------------------------------------------------------------------------------------------------------------------------------------------------------------------------------------------------------------------------------------------------------------------------------------------|
| <b>Introduction</b>                     | 0.08          | Background is thorough, detailed, understandable, and provides outstanding context for research. Clearly establishes personal relevance for reader. Included pictures and graphics clearly support context for research.                                                              | Background is reasonably thorough, detailed, and provides excellent context for research. Establishes personal relevance for reader. Included pictures and graphics mostly support research context.                                                                                                   | Background information, context for research, and reader relevance are average. There are few pictures and graphics that are peripherally related to context.                                                                                                                                                        | Background information, context for research, and reader relevance are below average. No pictures or graphics are included.                                                                                                                                                                              |
| <b>Question, Hypothesis, Prediction</b> | 0.12          | Questions are descriptive and written so that comparative relationships between experimental variables are clearly understood. Hypotheses are mostly clear and include explanatory statements. Predictions are specific and tightly connected with research questions and hypotheses. | Questions are reasonably descriptive and written so that comparative relationships between experimental variables are mostly understood. Hypotheses are reasonably clear and include explanatory statements. Predictions are specific and reasonably connected with research questions and hypotheses. | Questions are insightful, descriptive, and written so that comparative relationships between experimental variables are very clearly understood. Hypotheses are clear, articulate, and include explanatory statements. Predictions are highly specific and tightly connected with research questions and hypotheses. | Questions are somewhat descriptive. Comparative relationships between experimental variables are not well articulated. Hypotheses are somewhat unclear and explanatory statements are not readily evident. Predictions are unspecific and are not well connected with research questions and hypotheses. |
| <b>Materials</b>                        | 0.06          | Materials are highly descriptive, complete, and thorough. The experiment could be easily replicated using listed materials.                                                                                                                                                           | Materials are descriptive, complete, and reasonably thorough. The experiment could be reasonably replicated using listed materials.                                                                                                                                                                    | Materials are somewhat descriptive and mostly complete. Some additional information is needed in order to replicate the experiment from listed materials.                                                                                                                                                            | Materials are inaccurately described and incomplete. Considerable additional information is needed in order to replicate the experiment from listed materials.                                                                                                                                           |

### **Biology 101 Poster Evaluation Rubric**

| <b>Element</b>                        | <b>Weight</b> | <b>Excellent (9-10 pts)</b>                                                                                                                                                                           | <b>Good (7-8 pts)</b>                                                                                                                                                                                                    | <b>Proficient (5-6 pts)</b>                                                                                                                                                         | <b>Partially Proficient (3-4 pt)</b>                                                                                                                             |
|---------------------------------------|---------------|-------------------------------------------------------------------------------------------------------------------------------------------------------------------------------------------------------|--------------------------------------------------------------------------------------------------------------------------------------------------------------------------------------------------------------------------|-------------------------------------------------------------------------------------------------------------------------------------------------------------------------------------|------------------------------------------------------------------------------------------------------------------------------------------------------------------|
| <b>Methods</b>                        | 0.07          | Experimental methods are highly descriptive, complete, thorough, and articulate. The experiment could be easily replicated using methods description.                                                 | Experimental methods are highly descriptive, complete, and thorough. The experiment could be easily replicated using methods description.                                                                                | Experimental methods are mostly well described and complete. The experiment could be reasonably replicated with some additional information.                                        | Experimental methods are not well described and are incomplete. The experiment could only be replicated with considerable additional information.                |
| <b>Quantitative Results</b>           | 0.15          | Graphs, statistics, and other measurement data are clearly described and provide compelling evidential support for experimental outcomes.                                                             | Graphs, statistics, and other measurement data are clearly described and provide persuasive evidential support for experimental outcomes.                                                                                | Graphs, statistics, and other measurement data are reasonably described and provide some evidential support for experimental outcomes.                                              | Graphs, statistics, and other measurement data are incompletely described and provide little evidential support for experimental outcomes.                       |
| <b>Qualitative Results</b>            | 0.12          | Pictures, descriptions, and general observations are clearly described and provide compelling evidential support for experimental outcomes.                                                           | Pictures, descriptions, and general observations are clearly described and provide persuasive evidential support for experimental outcomes.                                                                              | Pictures, descriptions, and general observations are reasonably described and provide some evidential support for experimental outcomes.                                            | Pictures, descriptions, and general observations are incompletely described and provide little evidential support for experimental outcomes.                     |
| <b>Discussion: Data Relationships</b> | 0.1           | Descriptions of data relationships are clear, thorough, and flow very logically from results. Discussion is compelling and thought-provoking. Results are explicitly related to research question(s). | Descriptions of data relationships are mostly clear and thorough and flow somewhat logically from results. Discussion is convincing and somewhat thought-provoking. Results are solidly related to research question(s). | Descriptions of data relationships are mostly clear, reasonably complete, and are based on results. Discussion is believable. Results are somewhat related to research question(s). | Descriptions of data relationships are somewhat unclear and incomplete. Discussion is somewhat believable. Results have little relation to research question(s). |

### **Biology 101 Poster Evaluation Rubric**

| <b>Element</b>                                             | <b>Weight</b> | <b>Excellent (9-10 pts)</b>                                                                                                                                                                       | <b>Good (7-8 pts)</b>                                                                                                                                                                      | <b>Proficient (5-6 pts)</b>                                                                                                                                                                               | <b>Partially Proficient (3-4 pt)</b>                                                                                                                                                                   |
|------------------------------------------------------------|---------------|---------------------------------------------------------------------------------------------------------------------------------------------------------------------------------------------------|--------------------------------------------------------------------------------------------------------------------------------------------------------------------------------------------|-----------------------------------------------------------------------------------------------------------------------------------------------------------------------------------------------------------|--------------------------------------------------------------------------------------------------------------------------------------------------------------------------------------------------------|
| <b>Discussion:<br/>Confounds and<br/>Future Directions</b> | 0.14          | The effects of controlled and uncontrolled variables on experimental outcomes are explicitly and thoroughly described. Suggestions for improving experiment are well described and highly useful. | The effects of controlled and uncontrolled variables on experimental outcomes are clearly described. Suggestions for improving experiment are reasonably well described and mostly useful. | The effects of controlled and uncontrolled variables on experimental outcomes are reasonably described. Suggestions for improving experiment are described in average detail and have average usefulness. | The effects of controlled and uncontrolled variables on experimental outcomes are incompletely described. Suggestions for improving experiment are incompletely described and have limited usefulness. |
| <b>Conclusions</b>                                         | 0.06          | Conclusions are solidly based on collected data, are scientific, and clearly answer the research question(s).                                                                                     | Conclusions are reasonably based on collected data, are scientific, and mostly answer the research question(s).                                                                            | Conclusions are somewhat based on collected data, are mostly scientific, and reasonably answer the research question(s).                                                                                  | Conclusions are incompletely based on collected data, are marginally scientific, and incompletely answer the research question(s).                                                                     |
| <b>Bibliography</b>                                        | 0.05          | References provide outstanding literature support, are highly appropriate, and are accurately formatted.                                                                                          | References provide very good literature support, are appropriate, and are accurately formatted.                                                                                            | References provide average literature support, are mostly appropriate, and are mostly accurately formatted.                                                                                               | References provide below average literature support, are somewhat inappropriate, and are inaccurately formatted.                                                                                       |
| <b>Format, Spelling and Grammar</b>                        | 0.05          | Formatting, spelling, and grammar are exemplary with no errors.                                                                                                                                   | Formatting, spelling, and grammar are very good with almost no errors.                                                                                                                     | Formatting, spelling, and grammar are reasonably good with few errors.                                                                                                                                    | Formatting, spelling, and grammar are substandard with somewhat frequent errors.                                                                                                                       |

## ***Biology 101 Poster Evaluation Rubric***

### **Incomplete or Absent (0-2 pts)**

Background description, context for research, and reader relevance are absent. No pictures or graphics are included.

Questions are not descriptive and comparative relationships between experimental variables are not evident. Hypotheses are unclear or absent and explanatory statements are not present. Predictions are unspecific and are not connected with research questions and hypotheses.

Materials are not described or are incomplete. Experiment cannot be replicated from materials list.

## ***Biology 101 Poster Evaluation Rubric***

### **Incomplete or Absent (0-2 pts)**

Methods are not described and are incomplete. Experiment cannot be replicated from methods information.

No quantitative data is provided for experimental outcomes.

No qualitative data is provided for experimental outcomes.

Descriptions of data relationships are absent or incomplete.  
Discussion is not believable.  
Results have no relation to research question(s).

## ***Biology 101 Poster Evaluation Rubric***

### **Incomplete or Absent (0-2 pts)**

The effects of controlled and uncontrolled variables on experimental outcomes are not described. No suggestions are made for improving experiment.

Conclusions are not based on collected data, are unscientific, and do not answer the research question(s).

References provide no literature support or are absent. Provided references are inaccurately formatted.

Formatting, spelling, and grammar are unacceptable with frequent errors.
