# Supplementary material for: Community-based Inquiry Improves Critical Thinking in General Education Biology
Source: Atypon-hosted journal article supplement (doi:10.1187/cbe.07-11-0097), 2008-09-01
Supplement: suppc.pdf [file suppc.pdf]

| Element                             | Weight | Excellent (9-10 pts)                                                                                                                         | Good (7-8 pts)                                                                                                                                      |
|-------------------------------------|--------|----------------------------------------------------------------------------------------------------------------------------------------------|-----------------------------------------------------------------------------------------------------------------------------------------------------|
| <b>Date and Location</b>            | 0.04   | Date and location are clearly and explicitly indicated. Detail is considerable and provides excellent context for experiment.                | Date and location are mostly clearly and explicitly indicated. Detail is sufficient and provides good context for experiment.                       |
| <b>Conditions</b>                   | 0.04   | Conditions are highly detailed and provide excellent context for experiment.                                                                 | Conditions are well detailed and provide good context for experiment.                                                                               |
| <b>Materials Used</b>               | 0.2    | Description of materials used is clear and thorough. Experiment could be easily replicated based on materials description.                   | Description of materials used is mostly clear and fairly thorough. Experiment could be fairly easily replicated based on materials description.     |
| <b>Methods Used</b>                 | 0.2    | Description of methods used is clear and thorough. Experiment could be easily replicated based on methods description.                       | Description of methods used is mostly clear and fairly thorough. Experiment could be fairly easily replicated based on methods description.         |
| <b>Data and Calculations</b>        | 0.2    | Data is well organized and complete. Calculations are clear and thorough.                                                                    | Data is mostly well organized and reasonably complete. Calculations are mostly clear and thorough.                                                  |
| <b>Results</b>                      | 0.2    | Observations, descriptions, graphs and other data are clearly described and provide compelling evidential support for experimental outcomes. | Observations, descriptions, graphs and other data are mostly clearly described and provide persuasive evidential support for experimental outcomes. |
| <b>Recommendations</b>              | 0.06   | Recommendations are clearly and thoroughly described and have high practical value.                                                          | Recommendations are mostly clearly and thoroughly described and have good practical value.                                                          |
| <b>Format, Spelling and Grammar</b> | 0.06   | Formatting, spelling, and grammar are excellent with no errors.                                                                              | Formatting, spelling, and grammar are good with few errors.                                                                                         |

| <b>Proficient (5-6 pts)</b>                                                                                                             | <b>Partially Proficient (3-4 pts)</b>                                                                                                         | <b>Incomplete or Absent (0-2 pts)</b>                                                                                            |
|-----------------------------------------------------------------------------------------------------------------------------------------|-----------------------------------------------------------------------------------------------------------------------------------------------|----------------------------------------------------------------------------------------------------------------------------------|
| Date and location are somewhat clearly indicated. Detail is sufficient and provides good context for experiment.                        | Date and location are unclearly indicated. Detail is insufficient and provides substandard context for experiment.                            | Date and location are not indicated. Detail is insufficient and provides no context for experiment.                              |
| Conditions are sufficiently detailed and provide average context for experiment.                                                        | Conditions are insufficiently detailed and provide substandard context for experiment.                                                        | Conditions are not detailed and provide no context for experiment.                                                               |
| Description of materials used is somewhat clear but needs additional detail. More information is required to replicate experiment.      | Description of materials used is unclear and lacks significant detail. Considerably more information is required to replicate experiment.     | Description of materials used is unclear or absent. Experiment could not be replicated based on materials description.           |
| Description of methods used is somewhat clear but needs additional detail. More information is required to replicate experiment.        | Description of methods used is unclear and lacks significant detail. Considerably more information is required to replicate experiment.       | Description of methods used is unclear or absent. Experiment could not be replicated based on methods description.               |
| Data is somewhat organized and somewhat complete. Calculations are sufficient.                                                          | Data is somewhat disorganized and somewhat incomplete. Calculations are insufficient.                                                         | Data is disorganized and incomplete. Calculations are non-existent.                                                              |
| Observations, descriptions, graphs and other data are somewhat described and provide some evidential support for experimental outcomes. | Observations, descriptions, graphs and other data are incompletely described and provide little evidential support for experimental outcomes. | Observations, descriptions, graphs and other data are not described and provide no evidential support for experimental outcomes. |
| Recommendations are reasonably described and have average practical value.                                                              | Recommendations are incompletely described and have limited practical value.                                                                  | Recommendations are not described and have no practical value.                                                                   |
| Formatting, spelling, and grammar are reasonably good with several errors.                                                              | Formatting, spelling, and grammar are substandard with somewhat frequent errors.                                                              | Formatting, spelling, and grammar are unacceptable with frequent errors.                                                         |
