# Supplementary material for: Community-based Inquiry Improves Critical Thinking in General Education Biology
Source: Atypon-hosted journal article supplement (doi:10.1187/cbe.07-11-0097), 2008-09-01
Supplement: suppd.pdf [file suppd.pdf]

| Element       | Weight | Excellent (9-10 pts)                                                                                                                                                                                                                                                                              | Good (7-8 pts)                                                                                                                                                                                                                                                               |
|---------------|--------|---------------------------------------------------------------------------------------------------------------------------------------------------------------------------------------------------------------------------------------------------------------------------------------------------|------------------------------------------------------------------------------------------------------------------------------------------------------------------------------------------------------------------------------------------------------------------------------|
| <b>Part 1</b> | 0.2    | Question identifies experimental variables and clearly shows comparative relationships between variables. Hypotheses are clear and include explanatory statements. Predictions are specific and tightly connected with research question and hypotheses.                                          | Question identifies experimental variables and mostly clearly shows comparative relationships between variables. Hypotheses are mostly clear and include explanatory statements. Predictions are mostly specific and highly connected with research question and hypotheses. |
| <b>Part 2</b> | 0.15   | Recognition of null and alternative hypothesis is strong. Application to current study is clearly articulated. Experimental design is clearly connected to null and alternative hypotheses. Controls are recognized and expertly applied to study design.                                         | Recognition of null and alternative hypothesis is fairly strong. Application to current study is fairly well articulated. Experimental design is mostly well connected to null and alternative hypotheses. Controls are recognized and well applied to study design.         |
| <b>Part 3</b> | 0.15   | Outcome measure is clearly identified, explicitly connected to null and alternative hypotheses, and solidly justified.                                                                                                                                                                            | Outcome measure is mostly clearly identified, well connected to null and alternative hypotheses, and well justified.                                                                                                                                                         |
| <b>Part 4</b> | 0.2    | Predictions are clearly and explicitly aligned to experimental outcomes. Supporting rationale for accepting and rejecting null hypothesis is expertly done.                                                                                                                                       | Predictions are strongly aligned to experimental outcomes. Supporting rationale for accepting and rejecting null hypothesis is excellently done.                                                                                                                             |
| <b>Part 5</b> | 0.3    | Comparison of predictions with experimental results is outstanding. Decision to accept or reject null hypothesis is soundly supported. Distinction between support and proof is clear and articulate. Generalizations from experimental results are highly appropriate with strong justification. | Comparison of predictions with experimental results is very good. Decision to accept or reject null hypothesis is well supported. Distinction between support and proof is clear. Generalizations from experimental results are appropriate with good justification.         |

Proficient (5-6 pts)

Question identifies experimental variables and somewhat clearly shows comparative relationships between variables. Hypotheses are somewhat clear and include explanatory statements. Predictions are somewhat specific and reasonably connected with research question and hypotheses.

Partially Proficient (3-4 pts)

Question identifies experimental variables and incompletely shows comparative relationships between variables. Hypotheses are somewhat unclear and include explanatory statements. Predictions are somewhat unspecific and not well connected with research question and hypotheses.

Incomplete or Absent (0-2 pts)

Questions are not descriptive and comparative relationships between experimental variables are not evident. Hypotheses are unclear or absent and explanatory statements are not present. Predictions are unspecific and are not connected with research questions and hypotheses.

Recognition of null and alternative hypothesis is adequate. Application to current study is somewhat articulated. Experimental design is somewhat connected to null and alternative hypotheses. Controls are recognized and reasonably applied to study design.

Recognition of null and alternative hypothesis is weak. Application to current study is not well articulated. Experimental design is somewhat disconnected from null and alternative hypotheses. Controls are recognized and incompletely applied to study design.

Recognition of null and alternative hypothesis is nonexistent. Application to current study is not articulated. Experimental design is disconnected from null and alternative hypotheses. Controls are not recognized and not applied to study design.

Outcome measure is somewhat clearly identified, reasonably connected to null and alternative hypotheses, and reasonably justified.

Outcome measure is not clearly identified, incompletely connected to null and alternative hypotheses, and not well justified.

Outcome measure is not identified, disconnected to null and alternative hypotheses, and not justified.

Alignment of predictions to experimental outcomes is reasonably clear. Supporting rationale for accepting and rejecting null hypothesis is reasonably done.

Alignment of predictions to experimental outcomes is somewhat unclear. Supporting rationale for accepting and rejecting null hypothesis is incomplete.

Alignment of predictions to experimental outcomes is unclear. Supporting rationale for accepting and rejecting null hypothesis is absent.

Comparison of predictions with experimental results is good.

Comparison of predictions with experimental results is somewhat lacking. Decision to accept or reject null hypothesis is somewhat unsupported.

Comparison of predictions with experimental results is unacceptable. Decision to accept or reject null hypothesis is unsupported. Distinction between support and proof is absent.

Decision to accept or reject null hypothesis is reasonably supported. Distinction between support and proof is mostly clear. Generalizations from experimental results are reasonably appropriate with some justification.

Distinction between support and proof is incompletely articulated. Generalizations from experimental results are somewhat inappropriate with weak justification.

Generalizations from experimental results are inappropriate with no justification.
