# Supplementary material for: Community-based Inquiry Improves Critical Thinking in General Education Biology
Source: Atypon-hosted journal article supplement (doi:10.1187/cbe.07-11-0097), 2008-09-01
Supplement: suppe.pdf [file suppe.pdf]

## BIOL 101 Peer Evaluation Form

### Collaborative Work Skills and Group Dynamics

Please evaluate the members of your collaborative laboratory team for this term using the criteria below. To complete the evaluation: review the performance criteria, then list each team member's name, circle a score (1-4) for each criteria, and add any relevant comments. Be sure to evaluate your own contributions as well.

| Contributions    | 4                                                                                                                                           | 3                                                                                                                                                  | 2                                                                                                                                           | 1                                                                                                                                        |
|------------------|---------------------------------------------------------------------------------------------------------------------------------------------|----------------------------------------------------------------------------------------------------------------------------------------------------|---------------------------------------------------------------------------------------------------------------------------------------------|------------------------------------------------------------------------------------------------------------------------------------------|
|                  | <i>Routinely</i> provides useful ideas in group participation and discussion. A <i>definite leader</i> who contributes a lot of effort.     | <i>Usually</i> provides useful ideas in group participation and discussion. A <i>strong</i> group member who tries hard!                           | <i>Sometimes</i> provides useful ideas in group participation and discussion. A <i>satisfactory</i> group member who does what is required. | <i>Rarely</i> provides useful ideas in group participation and discussion. May <i>refuse</i> to participate.                             |
| Quality of Work  | 4                                                                                                                                           | 3                                                                                                                                                  | 2                                                                                                                                           | 1                                                                                                                                        |
|                  | Contributed work is of <i>exceptional</i> quality and sets a high standard of excellence.                                                   | Contributed work is of <i>high quality</i> that provides an example of good quality work.                                                          | Provides <i>average quality</i> work that occasionally needs to be redone by other group members to ensure quality.                         | Provides <i>low quality</i> work that usually needs to be redone by others to ensure quality.                                            |
| Effort           | 4                                                                                                                                           | 3                                                                                                                                                  | 2                                                                                                                                           | 1                                                                                                                                        |
|                  | Work clearly reflects the student's <i>best efforts</i> .                                                                                   | Work reflects a <i>strong effort</i> from student.                                                                                                 | Work reflects a <i>reasonable effort</i> from student.                                                                                      | Work reflects <i>little effort</i> on the part of student.                                                                               |
| Attitude         | 4                                                                                                                                           | 3                                                                                                                                                  | 2                                                                                                                                           | 1                                                                                                                                        |
|                  | Public criticism of work is based on sound reasoning and is <i>never</i> personal. <i>Always</i> has a positive attitude about the task(s). | Public criticism of work is <i>mostly</i> based on reasoning and is <i>never</i> personal. <i>Often</i> has a positive attitude about the task(s). | Criticism of work is based mostly on opinion and is somewhat personal. <i>Usually</i> has a positive attitude about the task(s).            | <i>Often</i> is publicly and personally critical of the project or others' work. <i>Often</i> has a negative attitude about the task(s). |
| Focus on Task    | 4                                                                                                                                           | 3                                                                                                                                                  | 2                                                                                                                                           | 1                                                                                                                                        |
|                  | <i>Consistently</i> stays focused on task and what needs to be done. Very self-directed.                                                    | Mostly focused on task and what needs to be done. Other group members can count on this person.                                                    | <i>Somewhat</i> focused on task. Other group members must sometimes remind this person to stay on task.                                     | <i>Rarely</i> focuses on the task and what needs to be done. Lets others do the work.                                                    |
| Work with Others | 4                                                                                                                                           | 3                                                                                                                                                  | 2                                                                                                                                           | 1                                                                                                                                        |
|                  | <i>Almost always</i> listens to and supports the efforts of others. Tries to keep people working well together.                             | <i>Usually</i> listens to and supports the efforts of others. Does not cause "waves" in the group.                                                 | <i>Often</i> listens to and supports the efforts of others, but sometimes is not a good team member.                                        | <i>Rarely</i> listens to and supports the efforts of others. Often is not a good team player.                                            |
| Problem-solving  | 4                                                                                                                                           | 3                                                                                                                                                  | 2                                                                                                                                           | 1                                                                                                                                        |
|                  | Actively looks for and suggests solutions to problems.                                                                                      | Refines solutions suggested by others.                                                                                                             | Does not suggest or refine solutions, but is willing to try out solutions suggested by others.                                              | Does <i>not try</i> to solve problems or help others solve problems. Lets others do the work.                                            |
| Group Efficacy   | 4                                                                                                                                           | 3                                                                                                                                                  | 2                                                                                                                                           | 1                                                                                                                                        |
|                  | <i>Routinely</i> monitors group effectiveness and works to make it more effective.                                                          | <i>Semi-consistently</i> monitors group effectiveness and suggests ways to make the group more effective.                                          | <i>Occasionally</i> monitors group effectiveness and gives some effort to make group more effective.                                        | <i>Rarely</i> monitors the effectiveness of the group and does not work to make it more effective.                                       |

Student Evaluator: \_\_\_\_\_

Team Member Name: \_\_\_\_\_

| Criteria         | Score |   |   |   | Comments |
|------------------|-------|---|---|---|----------|
|                  | 4     | 3 | 2 | 1 |          |
| Contributions    | 4     | 3 | 2 | 1 |          |
| Quality of Work  | 4     | 3 | 2 | 1 |          |
| Effort           | 4     | 3 | 2 | 1 |          |
| Attitude         | 4     | 3 | 2 | 1 |          |
| Focus on Task    | 4     | 3 | 2 | 1 |          |
| Work with Others | 4     | 3 | 2 | 1 |          |
| Problem-solving  | 4     | 3 | 2 | 1 |          |
| Group Efficacy   | 4     | 3 | 2 | 1 |          |

Team Member Name: \_\_\_\_\_

| Criteria         | Score |   |   |   | Comments |
|------------------|-------|---|---|---|----------|
|                  | 4     | 3 | 2 | 1 |          |
| Contributions    | 4     | 3 | 2 | 1 |          |
| Quality of Work  | 4     | 3 | 2 | 1 |          |
| Effort           | 4     | 3 | 2 | 1 |          |
| Attitude         | 4     | 3 | 2 | 1 |          |
| Focus on Task    | 4     | 3 | 2 | 1 |          |
| Work with Others | 4     | 3 | 2 | 1 |          |
| Problem-solving  | 4     | 3 | 2 | 1 |          |
| Group Efficacy   | 4     | 3 | 2 | 1 |          |

Team Member Name: \_\_\_\_\_

| Criteria         | Score |   |   |   | Comments |
|------------------|-------|---|---|---|----------|
|                  | 4     | 3 | 2 | 1 |          |
| Contributions    | 4     | 3 | 2 | 1 |          |
| Quality of Work  | 4     | 3 | 2 | 1 |          |
| Effort           | 4     | 3 | 2 | 1 |          |
| Attitude         | 4     | 3 | 2 | 1 |          |
| Focus on Task    | 4     | 3 | 2 | 1 |          |
| Work with Others | 4     | 3 | 2 | 1 |          |
| Problem-solving  | 4     | 3 | 2 | 1 |          |
| Group Efficacy   | 4     | 3 | 2 | 1 |          |
